# Supplementary material
Source: Springer Nature journal article supplement (https://www.springermedizin.de/resource/supplementary/13023_2011_350_MOESM5_ESM.pdf/9642158)

**4A**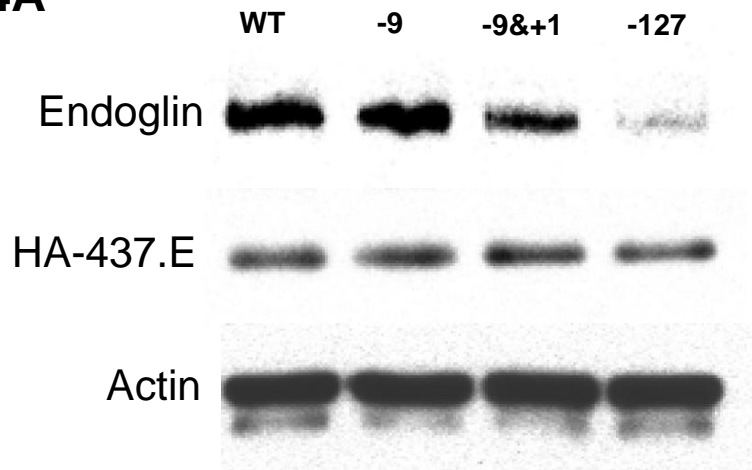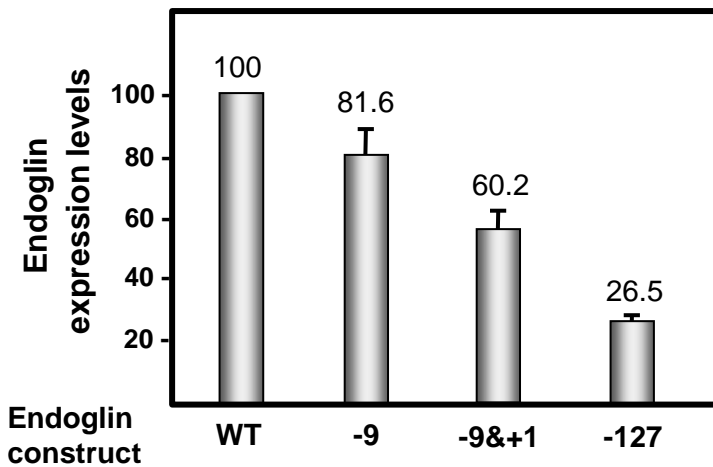**4B**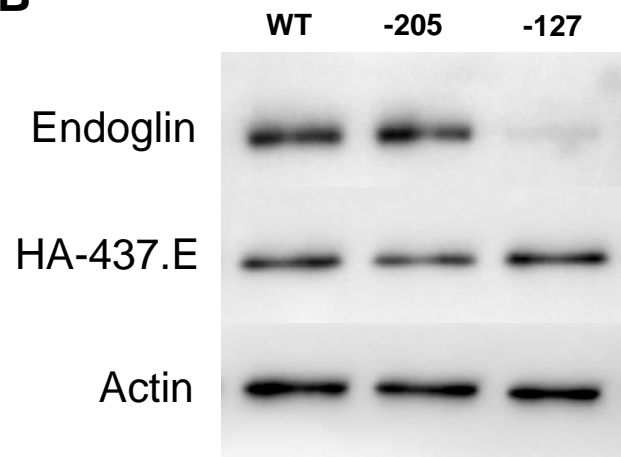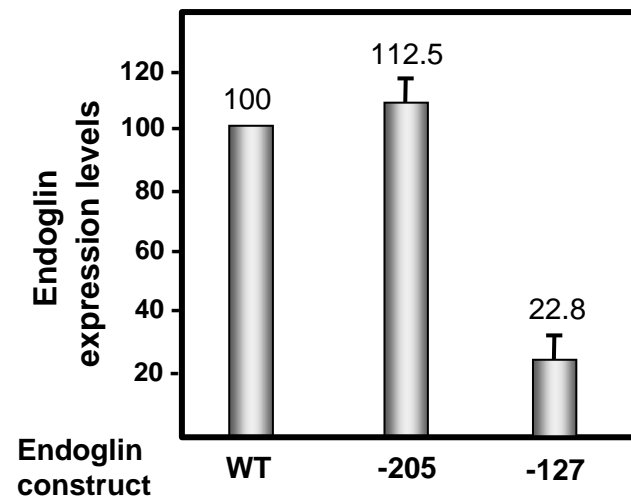

Supplement: MOESM5 [file 9642158]
